# Supplementary material for: Circulating exosomes from patients with systemic lupus erythematosus induce a proinflammatory immune response
Source: Springer Nature journal article supplement (doi:10.1186/s13075-016-1159-y), 2016-11-16

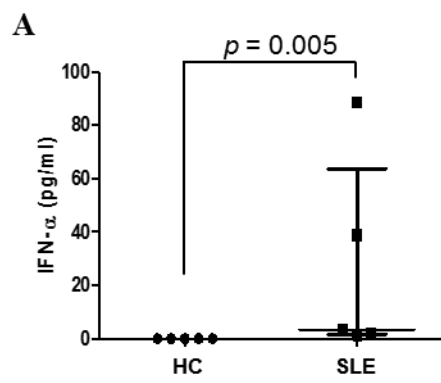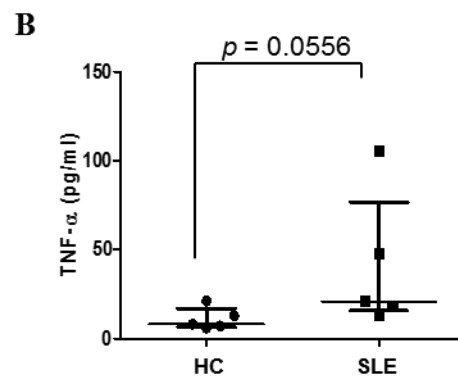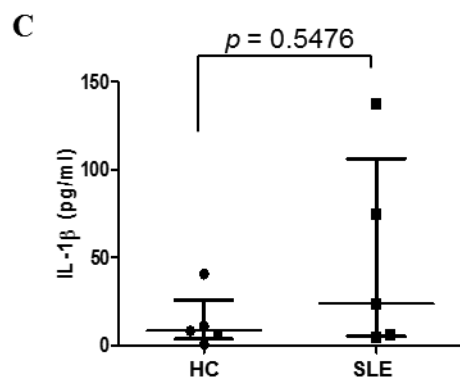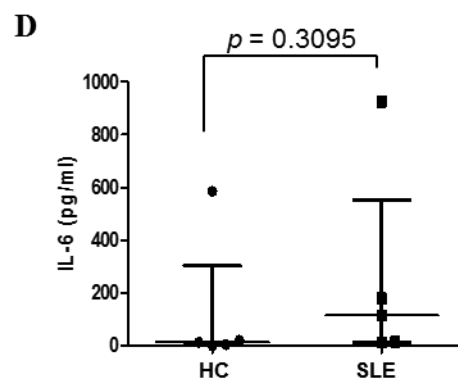

Supplement: 13075_2016_1159_MOESM2_ESM.pdf [file 13075_2016_1159_MOESM2_ESM.pdf]
